# Supplementary material for: The effect of the Alive & Thrive initiative on exclusive breastfeeding in rural Burkina Faso: a repeated cross-sectional cluster randomised controlled trial
Source: PubMed Central journal article supplement (PMC6379822; doi:10.1016/s2214-109x(18)30494-7), 2019-02-14
Supplement: mmc1.pdf [file mmc1.pdf]

# THE LANCET

## Global Health

### Supplementary appendix

This appendix formed part of the original submission and has been peer reviewed. We post it as supplied by the authors.

Supplement to: Cresswell JA, Ganaba R, Sarrassat S, et al. The effect of the Alive & Thrive initiative on exclusive breastfeeding in rural Burkina Faso: a repeated cross-sectional cluster randomised controlled trial. *Lancet Glob Health* 2019; **7**: e357–65.

## **Supplementary Web Appendix**

**Jenny A Cresswell, Rasmané Ganaba, Sophie Sarrassat, Henri Somé, Abdoulaye Hama Diallo, Simon Cousens, Veronique Filippi. “A repeated cross-sectional cluster randomised controlled trial to investigate the effect of the Alive & Thrive initiative on exclusive breastfeeding in rural Burkina Faso” Lancet Global Health**

**Figure S1: Map of communes randomised**

Pink cross-hatch = control commune; green stripes = intervention commune; solid grey = excluded commune

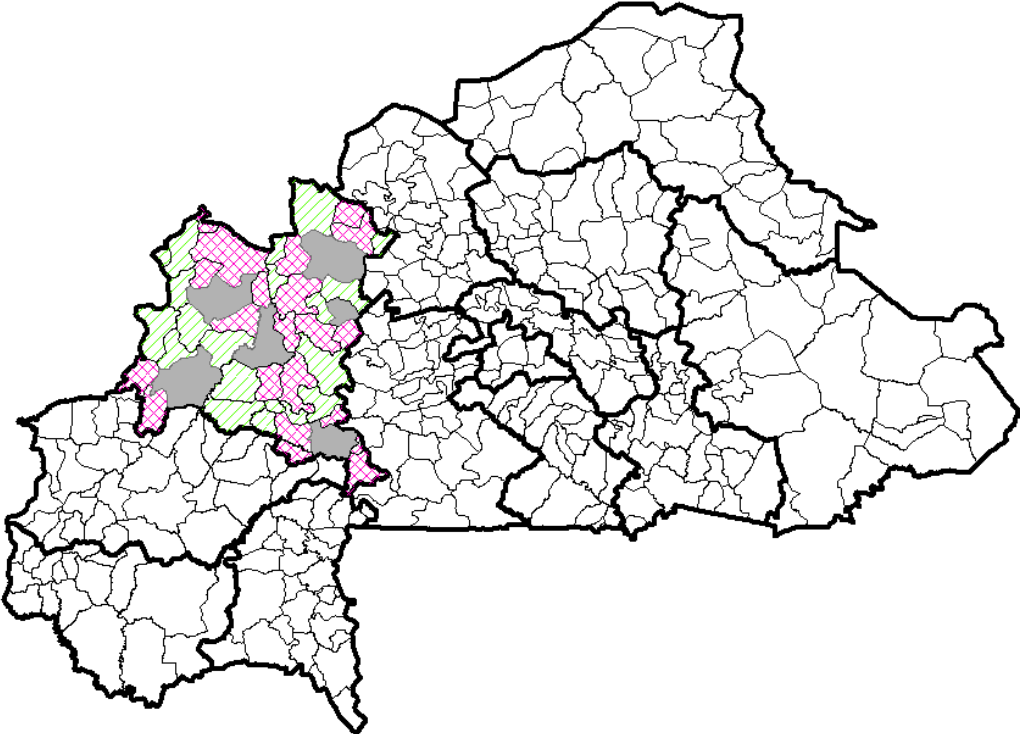

**Figure S2: Risk difference in exclusive breastfeeding, stratified by province**

*Note. 20% indicates the hypothesised effect size a priori*

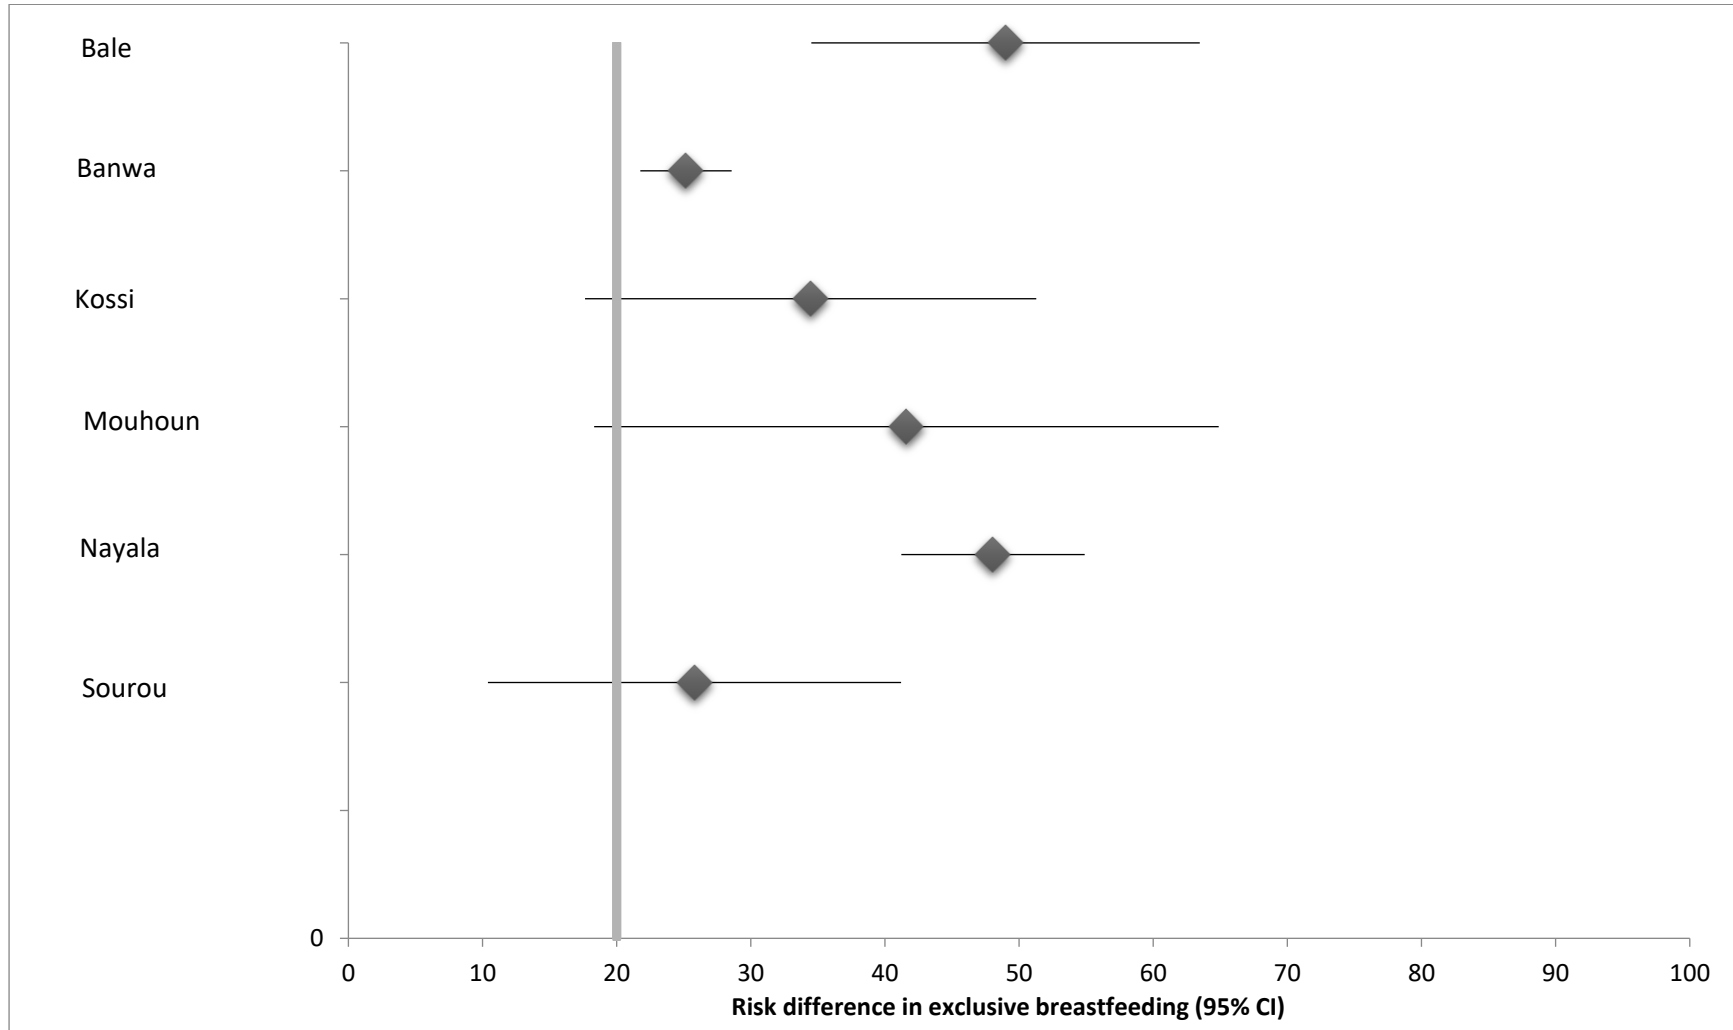

**Table S1A: Food and liquid consumption in the day and night preceding the survey among infants <6 months at endline; breakdown of exclusive breastfeeding**

|                                                        | <b>Control Arm<br/>N (%)</b> | <b>Intervention Arm<br/>N (%)</b> |
|--------------------------------------------------------|------------------------------|-----------------------------------|
| Pure water                                             | 254 (43.5%)                  | 31 (5.6%)                         |
| Sugary or salty water                                  | 7 (1.2%)                     | 1 (0.2%)                          |
| Coffee or tea                                          | 11 (1.9%)                    | 2 (0.4%)                          |
| Infusion                                               | 123 (21.6%)                  | 6 (1.1%)                          |
| Fruit juice                                            | 2 (0.3%)                     | 0                                 |
| Dolo (locally-brewed alcoholic drink) or other alcohol | 1 (0.2%)                     | 2 (0.4%)                          |
| Cow or goat's milk                                     | 2 (0.3%)                     | 1 (0.2%)                          |
| Formula/powdered milk substitute                       | 3 (0.5%)                     | 1 (0.2%)                          |
| Other liquid                                           | 0                            | 0                                 |
| Yoghurt; curds                                         | 0                            | 1 (0.2%)                          |
| Soup                                                   | 3 (0.5%)                     | 0                                 |
| Bouille (thin gruel/porridge)                          | 10 (1.7%)                    | 3 (0.5%)                          |
| Cereal-based dish such as rice, pasta, millet or tô    | 2 (0.3%)                     | 2 (0.4%)                          |
| Black-eyed peas                                        | 0                            | 0                                 |
| Yellow/orange vegetables such as carrot or squash      | 0                            | 0                                 |
| Tuber-based dish such as potato, yam, or cassava       | 0                            | 0                                 |
| Dark green leaves such as spinach                      | 2 (0.3%)                     | 2 (0.4%)                          |
| Other vegetables                                       | 0                            | 0                                 |
| Meat or poultry                                        | 0                            | 0                                 |
| Offal                                                  | 0                            | 0                                 |
| Eggs                                                   | 0                            | 0                                 |
| Fresh or dried fish                                    | 1 (0.2%)                     | 0                                 |
| Mayflies, caterpillars, crickets                       | 0                            | 0                                 |
| Palm oil                                               | 0                            | 0                                 |
| Mango or papaya                                        | 0                            | 0                                 |
| Other fruit                                            | 0                            | 1 (0.2%)                          |
| Peanuts or cashew nuts                                 | 0                            | 0                                 |
| Snacks such as cakes, biscuits or crisps               | 2 (0.4%)                     | 1 (0.2%)                          |
| Other semi-solid or solid food                         | 0                            | 0                                 |
| None of the above (exclusively breastfed)              | 299 (51.2%)                  | 515 (93.3%)                       |
| <b>Total</b>                                           | <b>584</b>                   | <b>552</b>                        |

**Table S1B: Prevalence of secondary breastfeeding outcomes at endline, stratified by age group**

|                                   | Infant age (months) | Control Arm |                         | Intervention Arm |                         |
|-----------------------------------|---------------------|-------------|-------------------------|------------------|-------------------------|
|                                   |                     | N           | % (95% CI)              | N                | % (95% CI)              |
| Early initiation of breastfeeding | 0-5                 | 584         | 15.1%<br>(9.3%, 20.9%)  | 552              | 39.1%<br>(32.4%, 45.9%) |
|                                   | 6-11                | 577         | 13.7%<br>(7.7%, 19.7%)  | 540              | 34.4%<br>(25.4%, 43.4%) |
| Gave colostrum                    | 0-5                 | 584         | 75.9%<br>(68.2%, 83.5%) | 552              | 95.3%<br>(92.0%, 98.5%) |
|                                   | 6-11                | 577         | 72.8%<br>(65.7%, 79.9%) | 540              | 96.7%<br>(94.5%, 98.8%) |
| Received no prelacteal feeds      | 0-5                 | 584         | 90.3%<br>(85.1%, 95.3%) | 552              | 99.1%<br>(98.2%, 100%)  |
|                                   | 6-11                | 577         | 88.6%<br>(84.1%, 93.1%) | 540              | 99.4%<br>(98.8%, 100%)  |

**Table S2: Prevalence of reported exclusive breastfeeding and secondary breastfeeding outcomes at endline, as calculated using a difference-in-difference model on cluster-level data**

| Outcome                           | Survey   | Trial Arm            | Number of Clusters | Cluster Prevalence % (95% CI) | p-value |
|-----------------------------------|----------|----------------------|--------------------|-------------------------------|---------|
| Exclusive breastfeeding           | Baseline | Control Arm          | 19                 | 26.9%                         | <0.001  |
|                                   |          | Intervention Arm     | 18                 | 33.3%                         |         |
|                                   |          | Difference           | -                  | 6.4%                          |         |
|                                   | Endline  | Control Arm          | 19                 | 51.2% (42.2%, 60.1%)          |         |
|                                   |          | Intervention Arm     | 18                 | 93.2% (89.4%, 97.0%)          |         |
|                                   |          | Difference           | -                  | 42.1% (30.7%, 53.4%)          |         |
| Difference-in-Difference          | -        | 35.7% (19.6%, 51.7%) | <0.001             |                               |         |
| Early initiation of breastfeeding | Baseline | Control Arm          | 19                 | 10.1%                         | <0.001  |
|                                   |          | Intervention Arm     | 18                 | 8.7%                          |         |
|                                   |          | Difference           | -                  | -1.4%                         |         |
|                                   | Endline  | Control Arm          | 19                 | 14.4% (8.8%, 20.0%)           |         |
|                                   |          | Intervention Arm     | 18                 | 36.9% (29.8%, 43.9%)          |         |
|                                   |          | Difference           | -                  | 22.4% (15.8%, 29.0%)          |         |
| Difference-in-Difference          | -        | 23.8% (14.5%, 33.1%) | <0.001             |                               |         |
| Gave colostrum                    | Baseline | Control Arm          | 19                 | 72.9%                         | <0.001  |
|                                   |          | Intervention Arm     | 18                 | 76.5%                         |         |
|                                   |          | Difference           | -                  | 3.7%                          |         |
|                                   | Endline  | Control Arm          | 19                 | 74.5% (67.7%, 81.2%)          |         |
|                                   |          | Intervention Arm     | 18                 | 96.0% (93.6%, 98.4%)          |         |
|                                   |          | Difference           | -                  | 21.5% (14.6%, 28.4%)          |         |
| Difference-in-Difference          | -        | 17.9% (8.1%, 27.6%)  | <0.001             |                               |         |
| Received no prelacteal feeds      | Baseline | Control Arm          | 19                 | 81.8%                         | 0.003   |
|                                   |          | Intervention Arm     | 18                 | 87.9%                         |         |
|                                   |          | Difference           | -                  | 6.1%                          |         |
|                                   | Endline  | Control Arm          | 19                 | 89.5% (85.2%, 93.8%)          |         |
|                                   |          | Intervention Arm     | 18                 | 99.3% (98.7%, 99.8%)          |         |
|                                   |          | Difference           | -                  | 9.8% (3.5%, 16.2%)            |         |
| Difference-in-Difference          | -        | 3.7% (-5.3%, 12.7%)  | 0.414              |                               |         |
| Continued breastfeeding           | Baseline | Control Arm          | 19                 | 100%                          | 0.173   |
|                                   |          | Intervention Arm     | 18                 | 100%                          |         |
|                                   |          | Difference           | -                  | 0%                            |         |
|                                   | Endline  | Control Arm          | 19                 | 99.8% (99.5%, 100%)           |         |
|                                   |          | Intervention Arm     | 18                 | 100% (100%, 100%)             |         |
|                                   |          | Difference           | -                  | 0.2% (-0.1%, 0.4%)            |         |
| Difference-in-Difference          | -        | 0.2% (-0.2%, 0.5%)   | 0.334              |                               |         |

**Table S3: Prevalence of correct knowledge relating to optimal breastfeeding practices at endline, as calculated using a difference-in-difference model on cluster-level data**

| Outcome                                                                     | Survey   | Trial Arm            | Number of Clusters | Cluster Prevalence % (95% CI) | p-value |
|-----------------------------------------------------------------------------|----------|----------------------|--------------------|-------------------------------|---------|
| A mother should initiate breastfeeding during the first hour after delivery | Baseline | Control Arm          | 19                 | 37.0%                         |         |
|                                                                             |          | Intervention Arm     | 18                 | 40.6%                         |         |
|                                                                             |          | Difference           | -                  | 3.6%                          |         |
|                                                                             | Endline  | Control Arm          | 19                 | 50.7% (42.4%, 59.1%)          | <0.001  |
|                                                                             |          | Intervention Arm     | 18                 | 76.6% (72.0%, 81.1%)          |         |
|                                                                             |          | Difference           | -                  | 25.8% (17.6%, 34.0%)          |         |
| Difference-in-Difference                                                    | -        | 22.3% (10.7%, 33.8%) | <0.001             |                               |         |
| A mother should breastfeed exclusively for the first six months             | Baseline | Control Arm          | 19                 | 50.5%                         |         |
|                                                                             |          | Intervention Arm     | 18                 | 51.7%                         |         |
|                                                                             |          | Difference           | -                  | 1.2%                          |         |
|                                                                             | Endline  | Control Arm          | 19                 | 57.1% (48.6%, 65.5%)          | <0.001  |
|                                                                             |          | Intervention Arm     | 18                 | 80.5% (75.9%, 85.0%)          |         |
|                                                                             |          | Difference           | -                  | 23.4% (14.0%, 32.8%)          |         |
| Difference-in-Difference                                                    | -        | 22.2% (8.9%, 35.5%)  | 0.001              |                               |         |



**Table S4: Mother’s opinions relating to breastfeeding practices at endline, as calculated using a difference-in-difference model on cluster-level data**

| Mothers who agree with                                                           | Survey   | Trial Arm        | Number of Clusters      | Cluster Prevalence % (95% CI) | p-value |
|----------------------------------------------------------------------------------|----------|------------------|-------------------------|-------------------------------|---------|
| “Breastfeeding is a good thing for the health of the baby”                       | Baseline | Control Arm      | 19                      | 98.6%                         | 0.768   |
|                                                                                  |          | Intervention Arm | 18                      | 99.3%                         |         |
|                                                                                  |          | Difference       |                         | 0.6%                          |         |
|                                                                                  | Endline  | Control Arm      | 19                      | 99.4% (99.0%, 99.8%)          |         |
|                                                                                  |          | Intervention Arm | 18                      | 99.5% (98.9%, 100.0%)         |         |
|                                                                                  |          | Difference       |                         | 0.1% (-0.9%, 1.1%)            |         |
| Difference-in-Difference                                                         |          |                  | -0.5% (-2.0%, 0.9%)     | 0.492                         |         |
| “Breastfeeding is a good thing for the health of the mother”                     | Baseline | Control Arm      | 19                      | 88.8%                         | 0.949   |
|                                                                                  |          | Intervention Arm | 18                      | 88.2%                         |         |
|                                                                                  |          | Difference       |                         | -0.7%                         |         |
|                                                                                  | Endline  | Control Arm      | 19                      | 97.0% (96.0%, 98.0%)          |         |
|                                                                                  |          | Intervention Arm | 18                      | 96.8% (95.3%, 98.3%)          |         |
|                                                                                  |          | Difference       |                         | -0.2% (-6.7%, 6.3%)           |         |
| Difference-in-Difference                                                         |          |                  | 0.5% (-8.7%, 9.6%)      | 0.922                         |         |
| “If a mother breastfeeds, the baby will have less diarrhoea”                     | Baseline | Control Arm      | 19                      | 77.9%                         | 0.029   |
|                                                                                  |          | Intervention Arm | 18                      | 75.3%                         |         |
|                                                                                  |          | Difference       |                         | -2.7%                         |         |
|                                                                                  | Endline  | Control Arm      | 19                      | 88.0% (84.8%, 91.1%)          |         |
|                                                                                  |          | Intervention Arm | 18                      | 93.4% (91.5%, 95.3%)          |         |
|                                                                                  |          | Difference       |                         | 5.4% (0.6%, 10.3%)            |         |
| Difference-in-Difference                                                         |          |                  | 8.1% (1.2%, 15.0%)      | 0.022                         |         |
| “To give colostrum to a baby is not a good thing for their health”               | Baseline | Control Arm      | 19                      | 44.7%                         | <0.001  |
|                                                                                  |          | Intervention Arm | 18                      | 43.4%                         |         |
|                                                                                  |          | Difference       |                         | -4.4%                         |         |
|                                                                                  | Endline  | Control Arm      | 19                      | 42.9% (38.0%, 47.9%)          |         |
|                                                                                  |          | Intervention Arm | 18                      | 25.3% (19.4%, 31.2%)          |         |
|                                                                                  |          | Difference       |                         | -17.6% (-25.3%, -10.0%)       |         |
| Difference-in-Difference                                                         |          |                  | -13.3% (-24.1%, -2.4%)  | 0.017                         |         |
| “Cow’s milk is more nutritious for babies than breastmilk”                       | Baseline | Control Arm      | 19                      | 9.0%                          | 0.581   |
|                                                                                  |          | Intervention Arm | 18                      | 7.2%                          |         |
|                                                                                  |          | Difference       |                         | -1.8%                         |         |
|                                                                                  | Endline  | Control Arm      | 19                      | 9.6% (6.7%, 12.5%)            |         |
|                                                                                  |          | Intervention Arm | 18                      | 8.7% (6.4%, 11.0%)            |         |
|                                                                                  |          | Difference       |                         | -0.9% (-3.7%, 5.5%)           |         |
| Difference-in-Difference                                                         |          |                  | 0.9% (-3.7%, 5.5%)      | 0.690                         |         |
| “If a mother breastfeeds, the baby will have fewer illnesses”                    | Baseline | Control Arm      | 19                      | 84.8%                         | 0.146   |
|                                                                                  |          | Intervention Arm | 18                      | 84.0%                         |         |
|                                                                                  |          | Difference       |                         | -0.8%                         |         |
|                                                                                  | Endline  | Control Arm      | 19                      | 91.4% (89.0%, 93.8%)          |         |
|                                                                                  |          | Intervention Arm | 18                      | 94.4% (92.6%, 96.2%)          |         |
|                                                                                  |          | Difference       |                         | 3.0% (-1.1%, 7.1%)            |         |
| Difference-in-Difference                                                         |          |                  | 3.8% (-2.0%, 9.6%)      | 0.192                         |         |
| “A baby needs to drink water in addition to breastmilk”                          | Baseline | Control Arm      | 19                      | 73.7%                         | <0.001  |
|                                                                                  |          | Intervention Arm | 18                      | 75.1%                         |         |
|                                                                                  |          | Difference       |                         | 1.4%                          |         |
|                                                                                  | Endline  | Control Arm      | 19                      | 68.9% (62.5%, 75.4%)          |         |
|                                                                                  |          | Intervention Arm | 18                      | 34.0% (25.3%, 42.7%)          |         |
|                                                                                  |          | Difference       |                         | -34.9% (-43.8%, -26.1%)       |         |
| Difference-in-Difference                                                         |          |                  | -36.3% (-48.8%, -23.8%) | <0.001                        |         |
| “Tisanes* and infusions protect a baby’s health”                                 | Baseline | Control Arm      | 19                      | 71.4%                         | <0.001  |
|                                                                                  |          | Intervention Arm | 18                      | 58.8%                         |         |
|                                                                                  |          | Difference       |                         | -12.6%                        |         |
|                                                                                  | Endline  | Control Arm      | 19                      | 68.9% (61.5%, 76.3%)          |         |
|                                                                                  |          | Intervention Arm | 18                      | 25.0% (20.4%, 29.6%)          |         |
|                                                                                  |          | Difference       |                         | -43.9% (-52.7%, -35.1%)       |         |
| Difference-in-Difference                                                         |          |                  | -31.3% (-43.8%, -18.9%) | <0.001                        |         |
| “Whilst a mother is exclusively breastfeeding her baby, she can avoid pregnancy” | Baseline | Control Arm      | 19                      | 29.2%                         | 0.270   |
|                                                                                  |          | Intervention Arm | 18                      | 29.2%                         |         |
|                                                                                  |          | Difference       |                         | -0.0%                         |         |
|                                                                                  | Endline  | Control Arm      | 19                      | 39.1% (35.8%, 42.3%)          |         |
|                                                                                  |          | Intervention Arm | 18                      | 43.8% (37.3%, 50.4%)          |         |
|                                                                                  |          | Difference       |                         | 4.7% (-3.8%, 13.2%)           |         |
| Difference-in-Difference                                                         |          |                  | 4.8% (-7.2%, 16.8%)     | 0.430                         |         |

\* A tisane is a herbal tea used locally



**Table S5: Reported exposure to interventions similar to those in the A&T initiative among mothers with an infant <12 months (N=2,253)**

|                                                                                                              |                              |                                                                                                           | Control Arm<br>N=1,161 |       | Intervention Arm<br>N=1,092 |       |
|--------------------------------------------------------------------------------------------------------------|------------------------------|-----------------------------------------------------------------------------------------------------------|------------------------|-------|-----------------------------|-------|
|                                                                                                              |                              |                                                                                                           | N                      | %     | N                           | %     |
| At health facility                                                                                           | During pregnancy or delivery | Received advice from a health worker during antenatal care                                                | 389                    | 33.5% | 799                         | 73.2% |
|                                                                                                              |                              | Health worker assisted with initiation of breastfeeding                                                   | 408                    | 35.1% | 775                         | 71.0% |
|                                                                                                              |                              | Health worker discussed breastfeeding whilst still at the facility after delivery                         | 457                    | 39.4% | 789                         | 72.3% |
|                                                                                                              | Postpartum                   | Health worker asked about any difficulties breastfeeding during 1st postnatal checkup (for mother)        | 246                    | 21.2% | 466                         | 42.7% |
|                                                                                                              |                              | Health worker observed breastfeeding during 1st postnatal checkup (for mother)                            | 175                    | 15.1% | 371                         | 34.0% |
|                                                                                                              |                              | Health worker gave advice on good breastfeeding technique during the 1st postnatal checkup (for mother)   | 262                    | 22.6% | 511                         | 46.8% |
|                                                                                                              |                              | Health worker asked about any difficulties breastfeeding during 2nd postnatal checkup (for mother)        | 108                    | 9.3%  | 163                         | 14.9% |
|                                                                                                              |                              | Health worker observed breastfeeding during 2nd postnatal checkup (for mother)                            | 71                     | 6.1%  | 131                         | 12.0% |
|                                                                                                              |                              | Health worker gave advice on good breastfeeding technique during the 2nd postnatal checkup (for mother)   | 109                    | 9.4%  | 188                         | 17.2% |
|                                                                                                              |                              | Health worker asked about any difficulties breastfeeding during 1st postnatal checkup (for infant)        | 44                     | 3.8%  | 85                          | 7.8%  |
|                                                                                                              |                              | Health worker observed breastfeeding during 1st postnatal checkup (for infant)                            | 29                     | 2.5%  | 70                          | 6.4%  |
|                                                                                                              |                              | Health worker gave advice on good breastfeeding technique during the 1st postnatal checkup (for infant)   | 54                     | 4.7%  | 118                         | 10.8% |
|                                                                                                              |                              | Health worker asked about any difficulties breastfeeding during 2nd postnatal checkup (for infant)        | 19                     | 1.6%  | 46                          | 4.2%  |
|                                                                                                              |                              | Health worker observed breastfeeding during 2nd postnatal checkup (for infant)                            | 21                     | 1.8%  | 32                          | 2.9%  |
|                                                                                                              |                              | Health worker gave advice on good breastfeeding technique during the 2nd postnatal checkup (for infant)   | 35                     | 3.0%  | 60                          | 5.5%  |
|                                                                                                              |                              | Health worker asked about any difficulties breastfeeding during the most recent weighing appointment      | 150                    | 12.9% | 279                         | 25.5% |
|                                                                                                              |                              | Health worker observed breastfeeding during the most recent weighing appointment                          | 112                    | 9.7%  | 207                         | 19.0% |
|                                                                                                              |                              | Health worker gave advice on good breastfeeding technique during the the most recent weighing appointment | 199                    | 17.1% | 370                         | 33.9% |
|                                                                                                              |                              | Health worker asked about any difficulties breastfeeding during the most recent vaccination appointment   | 195                    | 16.8% | 414                         | 37.9% |
|                                                                                                              |                              | Health worker observed breastfeeding during the most recent vaccination appointment                       | 150                    | 12.9% | 287                         | 26.3% |
| Health worker gave advice on good breastfeeding technique during the the most recent vaccination appointment | 255                          | 22.0%                                                                                                     | 524                    | 48.0% |                             |       |
| In the community                                                                                             | During pregnancy             | Participated in at least one group meeting about breastfeeding in village                                 | 93                     | 8.0%  | 331                         | 30.3% |
|                                                                                                              |                              | ASBC visited home to give advice on breastfeeding                                                         | 24                     | 2.1%  | 167                         | 15.3% |
|                                                                                                              |                              | Participated in at least one group meeting about breastfeeding at the CSPS                                | 171                    | 14.7% | 459                         | 42.0% |
|                                                                                                              | Postpartum                   | Participated in at least one group meeting about breastfeeding in village                                 | 46                     | 4.0%  | 265                         | 24.3% |

|         |  |                                                                            |           |       |           |       |
|---------|--|----------------------------------------------------------------------------|-----------|-------|-----------|-------|
|         |  | ASBC visited home to give advice on breastfeeding                          | 20        | 1.7%  | 138       | 12.6% |
|         |  | Participated in at least one group meeting about breastfeeding at the CSPS | 169       | 14.6% | 348       | 31.9% |
|         |  | Attended a village event organised to discuss breastfeeding                | 12        | 1.0%  | 84        | 7.7%  |
| OVERALL |  | Discussed with a health worker 1+ times                                    | 754       | 64.9% | 1,097     | 93.1% |
|         |  | Received a home visit by an ASBC 1+ times                                  | 35        | 3.0%  | 244       | 22.3% |
|         |  | Participated in at least 1 causerie at a CSPS                              | 227       | 19.6% | 508       | 46.5% |
|         |  | Participated in at least 1 causerie in the village                         | 122       | 10.5% | 397       | 36.4% |
|         |  | Participated in at least 1 causerie                                        | 325       | 28.0% | 676       | 61.9% |
|         |  | Attended a village event                                                   | 12        | 1.0%  | 84        | 7.7%  |
|         |  | Had at least one exposure to one or more of the above                      | 791       | 68.1% | 1,050     | 96.2% |
|         |  | Mean exposures* (SD)                                                       | 2.6 (3.0) |       | 6.6 (4.8) |       |
|         |  | Median exposures* (IQR)                                                    | 2 (0, 4)  |       | 5 (3, 9)  |       |

**Table S6: Association between reported exposure to components similar to those in the A&T initiative among mothers living in the intervention arm and the study outcomes**

|                                                                                   |     | % Outcome | Risk difference | 95% CI |       | p-value |
|-----------------------------------------------------------------------------------|-----|-----------|-----------------|--------|-------|---------|
| <b>Outcome: exclusive breastfeeding among infants &lt;6m (N=552)</b>              |     |           |                 |        |       |         |
| Discussion with a health worker 1+ times                                          | No  | 81.8%     | Ref.            |        |       | 0.087   |
|                                                                                   | Yes | 94.0%     | 12.2%           | -4.8%  | 29.2% |         |
| Received a home visit 1+ times                                                    | No  | 92.2%     | Ref.            |        |       | 0.036   |
|                                                                                   | Yes | 96.9%     | 4.6%            | 0.3%   | 8.9%  |         |
| Participated in at least 1 causerie at a CSPS                                     | No  | 91.3%     | Ref.            |        |       | 0.028   |
|                                                                                   | Yes | 95.7%     | 4.4%            | 0.5%   | 8.3%  |         |
| Participated in at least 1 causerie at a village                                  | No  | 91.6%     | Ref.            |        |       | 0.171   |
|                                                                                   | Yes | 96.4%     | 4.7%            | -2.0%  | 11.5% |         |
| Participated in at least 1 causerie                                               | No  | 89.0%     | Ref.            |        |       | 0.038   |
|                                                                                   | Yes | 95.4%     | 6.4%            | 0.4%   | 12.4% |         |
| Attended a village event                                                          | No  | 93.2%     | Ref.            |        |       | 0.523   |
|                                                                                   | Yes | 95.7%     | 2.5%            | -5.1%  | 10.0% |         |
| Had at least one exposure                                                         | No  | 73.7%     | Ref.            |        |       | 0.139   |
|                                                                                   | Yes | 94.0%     | 20.3%           | -6.6%  | 47.2% |         |
| <b>Outcome: early initiation of breastfeeding among infants &lt;12m (N=1,092)</b> |     |           |                 |        |       |         |
| Discussion with a health worker 1+ times                                          | No  | 16.0%     | Ref.            |        |       | <0.001  |
|                                                                                   | Yes | 38.4%     | 22.3%           | 12.2%  | 32.5% |         |
| Received a home visit 1+ times                                                    | No  | 34.3%     | Ref.            |        |       | 0.023   |
|                                                                                   | Yes | 45.5%     | 11.2%           | 1.5%   | 20.8% |         |
| Participated in at least 1 causerie at a CSPS                                     | No  | 27.2%     | Ref.            |        |       | <0.001  |
|                                                                                   | Yes | 47.8%     | 20.6%           | 12.9%  | 28.3% |         |
| Participated in at least 1 causerie at a village                                  | No  | 33.7%     | Ref.            |        |       | 0.005   |
|                                                                                   | Yes | 42.3%     | 8.6             | 2.7%   | 14.6% |         |
| Participated in at least 1 causerie                                               | No  | 25.4%     | Ref.            |        |       | <0.001  |
|                                                                                   | Yes | 42.2%     | 16.8%           | 9.3%   | 24.3% |         |
| Attended a village event                                                          | No  | 36.7%     | Ref.            |        |       | 0.159   |
|                                                                                   | Yes | 38.1%     | 1.4%            | -13.2% | 15.9% |         |
| Had at least one exposure                                                         | No  | 11.9%     | Ref.            |        |       | <0.001  |
|                                                                                   | Yes | 37.8%     | 25.9%           | 16.9%  | 34.9% |         |
| <b>Outcome: gave colostrum among infants &lt;12m (N=1,092)</b>                    |     |           |                 |        |       |         |
| Discussion with a health worker 1+ times                                          | No  | 93.3%     | Ref.            |        |       | 0.379   |
|                                                                                   | Yes | 96.2%     | 2.8%            | -3.5%  | 9.1%  |         |
| Received a home visit 1+ times                                                    | No  | 95.6%     | Ref.            |        |       | 0.303   |
|                                                                                   | Yes | 97.1%     | 1.5%            | -1.3%  | 4.3%  |         |
| Participated in at least 1 causerie at a CSPS                                     | No  | 93.8%     | Ref.            |        |       | 0.017   |
|                                                                                   | Yes | 98.4%     | 4.6%            | 0.8%   | 8.4%  |         |
| Participated in at least 1 causerie at a village                                  | No  | 94.7%     | Ref.            |        |       | 0.014   |
|                                                                                   | Yes | 98.2%     | 3.6%            | 0.7%   | 6.4%  |         |
| Participated in at least 1 causerie                                               | No  | 91.4%     | Ref.            |        |       | 0.006   |

|                                                                      |     |        |       |       |       |        |
|----------------------------------------------------------------------|-----|--------|-------|-------|-------|--------|
|                                                                      | Yes | 98.1%  | 6.7%  | 1.9%  | 11.4% |        |
| Attended a village event                                             | No  | 95.6%  | Ref.  |       |       | 0.051  |
|                                                                      | Yes | 100.0% | 4.4%  | 3.1%  | 5.6%  |        |
| Had at least one exposure                                            | No  | 88.1%  | Ref.  |       |       | 0.157  |
|                                                                      | Yes | 96.3%  | 8.2%  | -3.2% | 19.5% |        |
| <b>Outcome: no pre-lacteal feeds among infants &lt;12m (N=1,092)</b> |     |        |       |       |       |        |
| Discussion with a health worker 1+ times                             | No  | 96.0%  | Ref.  |       |       | 0.076  |
|                                                                      | Yes | 99.5%  | 3.5%  | -0.4% | 7.4%  |        |
| Received a home visit 1+ times                                       | No  | 99.1%  | Ref.  |       |       | 0.1278 |
|                                                                      | Yes | 100.0% | 0.9%  | 0.3%  | 1.6%  |        |
| Participated in at least 1 causerie at a CSPS                        | No  | 98.6%  | Ref.  |       |       | 0.008  |
|                                                                      | Yes | 100%   | 1.3%  | 0.4%  | 2.3%  |        |
| Participated in at least 1 causerie at a village                     | No  | 99.3%  | Ref.  |       |       | 0.939  |
|                                                                      | Yes | 99.3%  | -0.0% | -1.0% | 0.9%  |        |
| Participated in at least 1 causerie                                  | No  | 98.6%  | Ref.  |       |       | 0.221  |
|                                                                      | Yes | 99.6%  | 1.0%  | -0.6% | 2.7%  |        |
| Attended a village event                                             | No  | 99.2%  | Ref.  |       |       | 0.413  |
|                                                                      | Yes | 100.0% | 0.8%  | 0.2%  | 1.3%  |        |
| Had at least one exposure                                            | No  | 95.2%  | Ref.  |       |       | 0.197  |
|                                                                      | Yes | 99.4%  | 4.2%  | -2.2% | 10.6% |        |
